# Supplementary material
Source: MDPI journal article supplement (https://www.mdpi.com/2073-4395/13/12/3031)
Supplement: s1 [file s1]

### Supplementary materials

Table S1 Explained variance in principal component analysis based on all data from four years. Years  $\times$  experimental variants equal 20.

| Principal component | Eigenvalue | Variance contribution rate (%) | Cumulative variance contribution rate (%) |
|---------------------|------------|--------------------------------|-------------------------------------------|
| 1                   | 3.49155183 | 69.83                          | 69.83                                     |
| 2                   | 0.97548876 | 19.51                          | 89.34                                     |
| 3                   | 0.51673794 | 10.33                          | 99.68                                     |
| 4                   | 0.0155089  | 0.31                           | 99.99                                     |
| 5                   | 0.00071256 | 0.01                           | 100.00                                    |

Table S2 Component matrix for principal component analysis based on all data from four years. Years × experimental variants equal 20.

| Indicator variable | Principal component |
|--------------------|---------------------|
|                    | 1                   |
| $X_1$              | 0.182358            |
| $X_2$              | 0.443934            |
| $X_3$              | 0.530042            |
| $X_4$              | 0.454098            |
| $X_5$              | 0.531525            |

Table S3 Comprehensive scores and ranking of the different treatments. Years × experimental variants equal 25.

| Year                 | Treatment        | Comprehensive score | ranking |
|----------------------|------------------|---------------------|---------|
| 2016                 | CK               | -0.068              | 2       |
|                      | M <sub>25</sub>  | -0.143              | 3       |
|                      | M <sub>50</sub>  | -0.337              | 5       |
|                      | M <sub>75</sub>  | 0.062               | 1       |
|                      | M <sub>100</sub> | -0.232              | 4       |
| 2017                 | CK               | -1.837              | 2       |
|                      | M <sub>25</sub>  | -1.729              | 1       |
|                      | M <sub>50</sub>  | -2.019              | 4       |
|                      | M <sub>75</sub>  | -2.053              | 5       |
|                      | M <sub>100</sub> | -2.011              | 3       |
| 2018                 | CK               | 1.565               | 2       |
|                      | M <sub>25</sub>  | 1.547               | 3       |
|                      | M <sub>50</sub>  | 1.489               | 4       |
|                      | M <sub>75</sub>  | 1.762               | 1       |
|                      | M <sub>100</sub> | 1.204               | 5       |
| 2019                 | CK               | 0.187               | 5       |
|                      | M <sub>25</sub>  | 0.449               | 4       |
|                      | M <sub>50</sub>  | 0.725               | 2       |
|                      | M <sub>75</sub>  | 0.863               | 1       |
|                      | M <sub>100</sub> | 0.576               | 3       |
| Average across years | CK               | -0.038              | 4       |
|                      | M <sub>25</sub>  | 0.031               | 2       |
|                      | M <sub>50</sub>  | -0.036              | 3       |
|                      | M <sub>75</sub>  | 0.159               | 1       |
|                      | M <sub>100</sub> | -0.116              | 5       |
